# Supplementary material for: ERRα suppression enhances the cytotoxicity of the MEK inhibitor trametinib against colon cancer cells
Source: Springer Nature journal article supplement (doi:10.1186/s13046-018-0862-8), 2018-09-05
Supplement: MOESM3 [file 16100064]

**Additional file 3:**

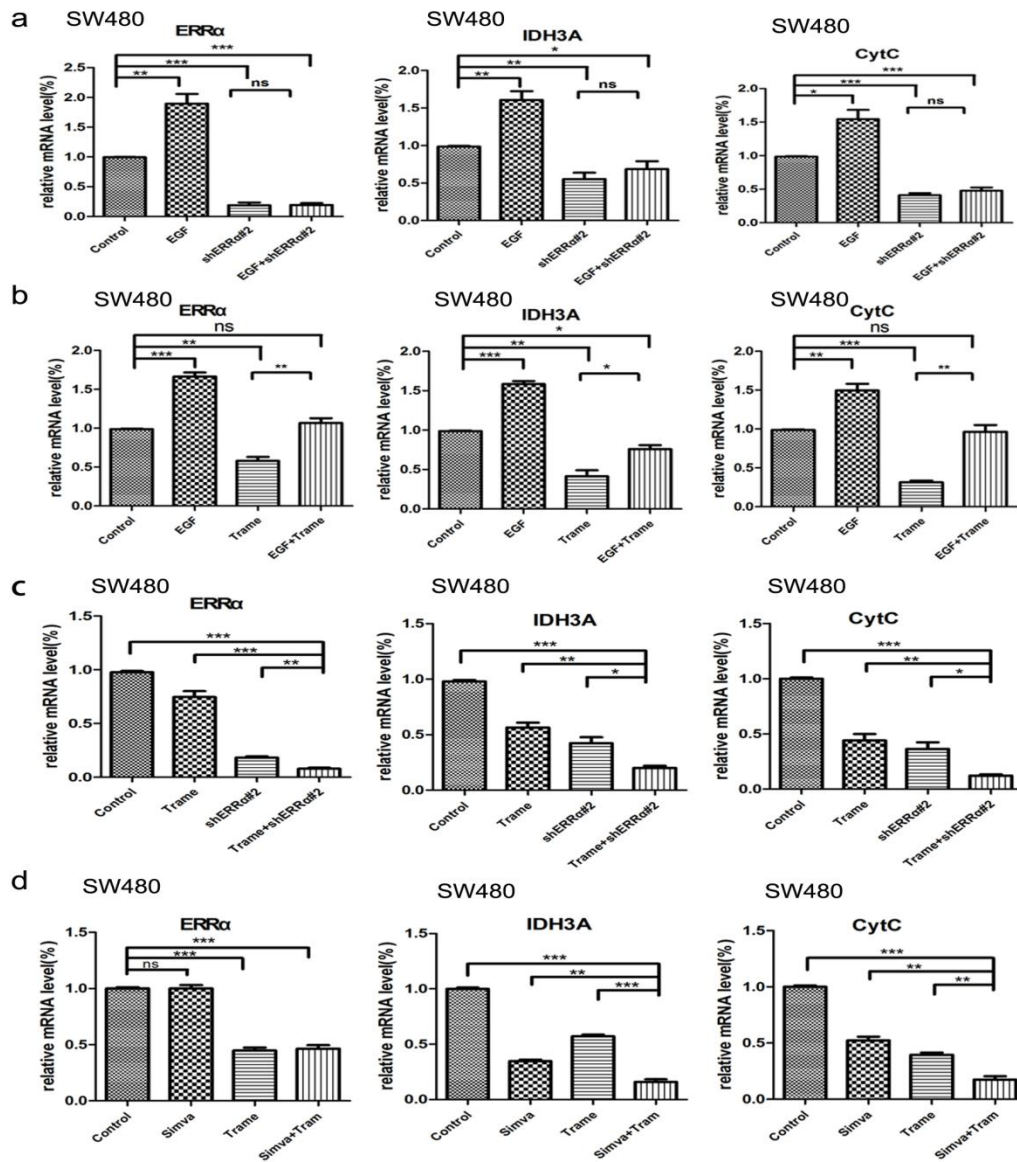

**Figure S6.** Quantitative RT-PCR analysis for interactions between drugs. **a** Quantitative real-time PCR analysis of ERRα, IDH3A and CytC in the SW480 cells treated with shNC or shERRα#2 (or/and 20 ng/μl EGF) for 2 d. **b** QPCR for ERRα, IDH3A and CytC in the SW480 cells treated with DMSO or trametinib (10 nM) (or/and 20 ng/μl EGF) for 2 d. **c** SW480 cells cultured with DMSO or 50 nM trametinib (or/and shERRα#2) at day 2 by qPCR assay. **d** Quantitative real-time PCR analysis of ERRα, IDH3A and CytC in the SW480 cells treated with 10 μM simvastatin (or/and 50 nM trametinib) for 2d.
