# Supplementary material for: ERRα suppression enhances the cytotoxicity of the MEK inhibitor trametinib against colon cancer cells
Source: Springer Nature journal article supplement (doi:10.1186/s13046-018-0862-8), 2018-09-05
Supplement: MOESM4 [file 16100064]

**Additional file 4:**

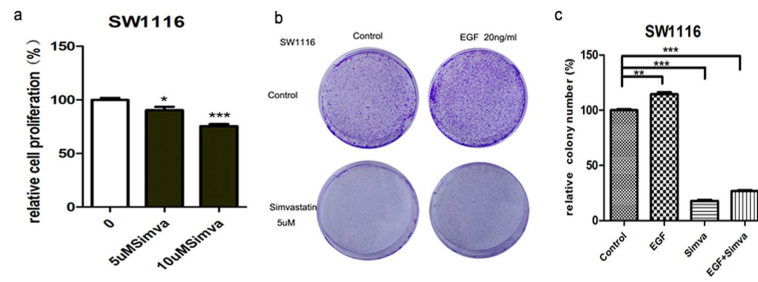

**Figure S3.** Simvastatin decreases the transcriptional activity of ERR $\alpha$  in colon cancer cells. **a** Cell proliferation assays at day 3 for the SW1116 cells cultured with simvastatin (5  $\mu$ M and 10  $\mu$ M) using the Cell Counting Kit-8. **b** Clonogenic assays and qualitative analysis of the SW1116 cells cultured with DMSO or 5  $\mu$ M simvastatin (or/and 20 ng/ $\mu$ l EGF) at day 7.
