# Supplementary material for: ERRα suppression enhances the cytotoxicity of the MEK inhibitor trametinib against colon cancer cells
Source: Springer Nature journal article supplement (doi:10.1186/s13046-018-0862-8), 2018-09-05
Supplement: MOESM5 [file 16100064]

**Additional file 5:**

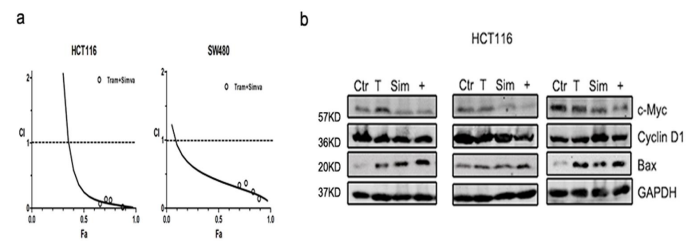

**Figure S4.** Antitumour effect of the combination of trametinib and simvastatin. **a** The CI and Fa of the HCT116 and SW480 cells treated with DMSO or 10  $\mu$ M simvastatin (or/and 50 nM trametinib) for 48 h by CompuSyn software. **b** The tumours were analysed for proliferation (c-Myc, cyclin D1) and proapoptotic (Bax) proteins by an immunoblot assay. GAPDH was used as the protein loading control.
