# Supplementary material for: ERRα suppression enhances the cytotoxicity of the MEK inhibitor trametinib against colon cancer cells
Source: Springer Nature journal article supplement (doi:10.1186/s13046-018-0862-8), 2018-09-05
Supplement: MOESM6 [file 16100064]

**Additional file 6:**

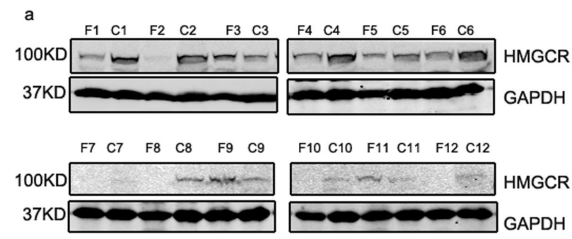

**Figure S5. a** HMGCR is higher in carcinomatous tissues. HMGCR were identified and confirmed by Western blot analysis in 12 pairs of colon cancer tissues. (F:distal normal tissues;C:colon cancer tissues)
